# Supplementary material for: A new and efficient synthesis of 2,2-disubstituted-3,4-dihydro-2H-1-benzopyrans †‡
Source: Royal Society of Chemistry journal article supplement (doi:10.1039/b004683n), 2000-01-01
Supplement: b004683n.doc [file b004683n.doc]

## Supplementary data

**A new and efficient synthesis of 2,2-disubstituted-3,4-dihydro-2*H*-1-benzopyrans**

# Jhillu S. Yadav,* Basi V. Subba Reddy and Syed R. Hashim

### Organic Division-I, Indian Institute of Chemical Technology, Hyderabad-500 007, India

#### Spectroscopic data for compounds 3b–k and 3m

**Entry 3b**. Colourless oil. 1H NMR (CDCl3) :  1.60 (s, 3H, Me ), 1.82-1.87 (dd, 1Hb, J = 12.6 and 11.8 Hz), 2.5 (dd, 1Ha, J = 12.6 and 6.2 Hz) 3.25 (s, 3H, 4-OMe), 3.45 (s, 3H,2-OMe), 3.85 (s, 3H, Ar-OMe), 4.65 (dd, 1Hc, J = 11.6 and 6.2 Hz), 6.75 (d, 1H, J = 8.6 Hz, ArH), 6.85 (t, 1H, J = 8.6 Hz, ArH), 7.05 (d, 1H, J = 8.6 Hz, ArH). 13C (Proton decoupled, CDCl3) :  24.5 (CH3), 35.78 (CH2), 47.72 (OCH3), 56.8 (OCH3), 64.50 (OCH3), 70.94 (CH), 100.5 (C), 103.25, 104.88, 105.67, 126.73 156.53, 157.67 (aromatic). IR (KBr) :  3035, 2955, 1475, 1210, 1055, 1010. EI MS: m/z (%), 238 M+ (30), 206 (50), 191 (60), 175 (80), 151 (100), 91 (15). Analysis calcd. for C13H18O4 (238.28) C, 65.53; H, 7.62. Found: C, 65.95; H, 7.81.

**Entry 3c**. Pale yellow oil. 1H NMR (CDCl3) :  1.45 (t, 3H, J = 8.2 Hz, OCH2CH3), 1.65 (s, 3H, Me), 1.85 (dd, 1Hb, J = 12.6 and 11.8 Hz), 2.45 (dd, 1Ha, J = 12.6 and 6.2 Hz), 3.25 (s, 3H, 4-OMe), 3.45 (s, 3H, 2-OMe), 4.08 (q, 2H, J = 8.2 Hz, OCH2CH3 ), 4.65 (dd, 1Hc, J = 11.8 and 6.2 Hz), 6.75 (d, 1H, J = 8.7 Hz, ArH), 6.85 (t, 1H, J = 8.7 Hz, ArH), 7.0 (d, J = 8.7 Hz, ArH). 13C (proton decoupled, CDCl3) :  24.8 (CH3), 35.70 (CH2), 47.65 (OCH3), 56.8 (OCH3), 63.8 (OCH2CH3), 16.45 (OCH2CH3), 70.87 (CH), 101.0 (C), 103.60, 104.78, 106.07, 126.05, 157.47, 158.23, (aromatic). IR (KBr) :  3040, 2959, 1460, 1235, 1030, 1005. EI MS : m/z (%) 252 M+ (25), 220 (90), 205 (80), 189 (100), 165 (70), 137 (50), 91 (45). Analysis calcd. for C14H20O4 (252.28) C, 66.65; H, 7.99. Found : C, 66.25; H, 7.53.

**Entry 3d**. Colourless oil. 1H NMR (CDCl3) :  1.50 (s, 3H, Me), 1.75 (dd, 1Hb, J = 12.4 and 11.6 Hz), 2.25 (s, 3H, ArCH3), 2.45 (dd, 1Ha, J = 12.4 and 6.1 Hz), 3.20 (s, 3H, 4-OMe), 3.45 (s, 3H, 2-OMe), 4.60 (dd, 1Hc, J = 11.6 and 6.1 Hz), 6.65 (d, 1H, J = 8.8 Hz, ArH), 6.95 (dd, 1H, J = 8.8 and 2.4 Hz, ArH), 7.20 (d, 1H, J = 2.4 Hz, ArH). 13C (proton decoupled, CDCl3):  21.50 (ArCH3), 23.8 (CH3), 36.6 (CH2), 48.2 (OCH3), 57.01 (OCH3), 74.36 (CH), 101.05 (C), 117.48, 125.98, 126.07, 128.80, 132.83, 150.05 (aroamtic). IR (KBr) :  3070, 2925, 1475, 1225, 1040, 1020. EI MS : m/z (%) 222 M+ (20), 190 (40), 175 (70), 159 (100), 135 (65), 91 (25). Analysis calcd. for C13H18 (222.28) C, 70.25; H, 8.1. Found : C, 70.05; H, 8.25.

**Entry 3e.** Colourless oil. 1H NMR (CDCl3) :  1.25 (d, 6H, J = 8.2 Hz, (CH3)2), 1.50 (s, 3H, Me ), 1.80 (dd, 1Hb, J = 12.4 and 11.6 Hz), 2.50 (dd, 1Ha, J = 12.4 and 6.1 Hz), 2.85 (m, 1H, CH), 3.25 (s, 3H, 4- OMe), 3.45 (s, 3H, 2-OMe), 4.65 (dd, 1Hc, J = 11.6 and 6.1 Hz), 6.65 (d, 1H, J = 8.7 Hz, ArH), 6.95 (dd, 1H, J = 8.7 and 2.5 Hz, ArH), 7.20 (d, 1H, J = 2.5 Hz, ArH). 13C (proton decoupled, CDCl3) :  23.5 (CH3), 24.2, 33.83 (isopropyl), 36.72 (CH2), 48.5 (OCH3), 57.07 (OCH3), 74.39 (CH), 100.8 (C), 117.8, 124.06, 124.50, 126.50, 144.0, 150.8 (aromatic). IR (KBr) :  3085, 2950, 1465, 1235, 1055, 1015. EI MS : m/z (%) 250 M+ (15), 218 (20), 203 (80), 187 (100), 163 (75), 71 (90). Analysis calcd. for C15H22O3 (250.34) C, 71.97; H, 9.18. Found : C, 71.88; H, 9.38.

**Entry 3f**. Colourless oil. 1H NMR (CDCl3) :  1.35 (s, 9H, t-Butyl), 1.55 (s, 3H, Me), 1.80 (dd, 1Hb, J = 12.45 and 11.6 Hz), 2.50 (dd, 1Ha, J = 12.4 and 6.1 Hz), 3.25 (s, 3H, 4-OMe), 3.45 (s, 3H, 2-OMe), 4.65 (dd, 1Hc, J = 11.6 and 6.1 Hz), 6.65 (d, 1H, J = 8.7 Hz, ArH), 7.15 (dd, 1H, J = 8.7 and 2.4 Hz, ArH), 7.40 (d, 1H, J = 2.4 Hz, ArH). 13C (proton decoupled, CDCl3) :  23.8 (CH3), 31.48, 34.55 (t-butyl), 36.75 (CH2), 48.45 (OCH3), 57.15 (OCH3), 74.41 (CH), 101.01 (C), 118.27, 122.49, 123.85, 126.08, 146.28, 149.32 (aromatic). IR (KBr) :  3120, 3017, 1460, 1250, 1030,1005. EI MS : m/z (%) 264 M+ (20), 233 (30), 217 (70), 201 (100), 177 (75), 91 (25). Analysis calcd. for C16H24O3 (264.36) C, 72.69; H, 9.18. Found : C, 72.43; H, 9.05.

**Entry 3g**. Colourless oil. 1H NMR (CDCl3) :  0.70 (t, 3H, J = 8.1 Hz, CH3), 1.30 (s, 6H, (CH3)2), 1.55 (s, 3H, Me), 1.65 (q, 2H, J = 8.1 Hz, CH2), 1.75 (dd, 1Hb, J = 12.4 and 11.6 Hz), 2.45 (dd, 1Ha, J = 12.4 and 6.1 Hz), 3.25 (s, 3H, 4-OMe), 3.45 (s, 3H, 2-OMe), 4.65 (dd, 1Hc, J = 11.6 and 6.1 Hz, ArH), 6.70 (d, 1H, J = 8.8 Hz, ArH), 7.10 (dd, 1H, J = 8.8 and 2.5 Hz, ArH), 7.3 (d, 1H, J = 2.5 Hz, ArH). 13C (proton decoupled, CDCl3) :  10.05, 26.83, 37.8, 38.40 (t-amyl), 23.78 (CH3), 36.55 (CH2), 48.49 (OCH3), 57.10 (OCH3), 74.56 (CH), 101.07 (C), 118.17, 124.72, 125.49, 126.84, 145.81, 148.70 (aromatic). IR (KBr)  3080, 2950, 1470, 1225, 1015. EI MS : m/z (%) 278 M+ (30), 247 (45), 231 (70), 215 (100), 191 (75), 91 (20). Analysis calcd. for C17H26O3 (278.39) C, 73.35; H, 9.71. Found : C, 73.51; H, 9.17

**Entry 3h.** Yellow oil. 1H NMR (CDCl3) :  1.55 (s, 3H, Me), 1.75 (dd, 1Hb, J = 12.5 and 11.6 Hz), 2.45 (dd, 1Ha, 12.5 and 6.2 Hz), 3.25 (s, 3H, 4-OMe), 3.45 (s, 3H, 2-OMe), 4.65 (dd, 1Hc, J = 11.6 and 6.2 Hz, ArH), 6.65 (d, 1H, J = 8.8 Hz, ArH), 7.25 (dd, 1H, J = 8.8 and 2.6 Hz, ArH), 7.5 (d, 1H, J = 2.6 Hz, ArH). 13C (proton decoupled, CDCl3) :  23.5 (CH3), 37.05 (CH2), 47.78 (OCH3), 57.01 (OCH3), 76.83 (CH), 101.05 (C), 115.17, 124.28, 128.57, 128.37, 129.58, 150.01 (aromatic). IR (KBr) :  3035, 2960, 1485, 1235, 1030, 1020. EI MS : m/z (%) 242 M+ (20), 211 (40), 195 (70), 179 (100), 155 (60), 141 (30), 115 (10), 91 (20). Analysis calcd. for C12H15O3Cl (242.70) C, 59.39; H, 6.23; Cl, 14.61. Found : C, 59.17; H, 6.48, Cl, 14.57.

**Entry 3i.** Yellow oil. 1H NMR (CDCl3) :  1.50 (s, 3H, Me), 1.72 (dd, 1Hb, J = 12.5 and 11.6 Hz), 2.3 (dd, 1Ha, J = 12.5 and 6.2 Hz), 3.20 (s, 3H, 4-OMe), 3.45 (s, 3H, 2-OMe), 4.60 (dd, 1Hc, J = 11.6 and 6.2 Hz), 6.65 (d, 1H, J = 8.7 Hz, ArH), 7.25 (dd, 1H, J = 8.7 and 2.5Hz, ArH), 7.5 (d, 1H, J = 2.5 Hz, ArH). 13C (proton decoupled, CDCl3) :  23.5 (CH3), 37.05 (CH2), 47.78 (OCH3), 57.01 (OCH3), 76.83 (CH), 101.05 (C), 117.45, 108.6, 127.23, 128.38, 131.06, 149.17 (aromatic). IR (KBr) :  3020, 2940, 1470, 1250, 1085, 1015. EI MS : m/z 286 M+ 288 M2+ (20), 257 (35), 241 (80), 225 (100), 221 (70), 207 (35), 91 (10). Analysis calcd. for C12H15O3Br (287.15) C, 50.19; H, 5.29; Br, 27.83. Found : C, 50.23; H, 5.15, Br, 27.78.

**Entry 3j.** Yellow liquid. 1H NMR (CDCl3) :  1.65 (s, 3H, Me), 1.78 (dd, 1Hb, J = 12.8 and 11.8 Hz), 2.35 (dd, 1Ha, J = 12.8 and 6.5 Hz), 3.25 (s, 3H, 4-OMe), 3.48 (s, 3H, 2-OMe), 4.65 (dd, 1Hc, J = 11.8 and 6.5 Hz), 6.8 (d, 1H, J = 8.8 Hz, ArH), 7.45 (dd, 1H, J = 8.8 and 2.8Hz, ArH), 7.95 (d, 1H, J = 2.8 Hz, ArH). 13C (proton decoupled, CDCl3) :  24.05 (CH3), 38.05 (CH2), 47.95 (OCH3), 57.05 (OCH3), 77.15 (CH), 101.05 (C), 110.06, 118.6, 127.25, 128.4, 132.07, 150.5 (aromatic). IR (KBr) :  3080, 2970, 1475, 1240, 1060, 1005. EI MS : m/z 253 M+ (25), 222 (35), 206 (80), 190 (100), 166 (50), 91 (20),. Analysis calcd. for C12 H15 N O5 (253.09) C, 56.9; H, 5.97; N, 5.53; Found : C, 56.97; H, 5.99, N, 5.55.

**Entry 3k.** Viscous liquid. 1H NMR (CDCl3) :  1.70 (s, 3H, Me), 2.35 (dd, 1Hb, J = 12.4 and 11.6 Hz), 2.60 (dd, 1Ha, J = 12.4 and 6.1 Hz), 3.25 (s, 3H, 4-OMe), 3.45 (s, 3H,2-OMe), 5.15 (dd, 1Hc, J = 11.5 and 6.1 Hz,), 7.05 (d, 1H, J = 8.7 Hz, ArH), 7.35 (t, 1H, J = 8.7 Hz, ArH), 7.5 (t, 1H, J = 8.7 Hz, ArH), 7.75 (t, 2H, J = 8.7 Hz, ArH), 8.0 (d, 1H, J = 8.7 Hz, ArH). 13C (proton decoupled, CDCl3) :  23.15 (CH3), 35.75 (CH2), 48.35 (OCH3), 57.01 (OCH3), 75.10 (CH), 101.25 (C), 108.01, 119.78, 120.41, 123.45, 125.0, 125.20, 126.83, 137.58, 138.74, 149.08 (aromatic). IR (KBr) :  3145, 3060, 2925, 1470, 1250, 1080, 1020. EI MS : m/z (%) 258 M+ (30), 227 (70), 195 (100), 171 (60), 112 (20). Analysis calcd. for C16H18O3 (258.32) C,74.40; H, 7.02. Found : C, 74.17; H, 7.13.

**Entry 3m.** Pale yellow liquid. 1H NMR (CDCl3) :  2.15 (s, 3H, CH3), 2.50 (dd, 1Hb, J = 15.6 and 4.4 Hz), 2.90 (dd, 1Ha, J = 15.6 and 8.9 Hz), 3.15 (s, 3H, OMe), 4.50 (dd, 1Hc, J = 8.9 and 4.4 Hz), 5.95 (s, 2H, OCH2O), 6.80 (m, 3H). 13C (proton decoupled, CDCl3) :  31.57 (CH3), 209.56 (CO), 48.45 (CH2), 56.61 (OCH3), 78.0 (CH), 103 (OCH2O), 108.01, 109.55, 122.83, 134.57, 146.78, 148.45 (aromatic). IR (KBr) :  3035, 2925, 1717, 1446, 1248, 1092, 1037. EI MS : m/z (%) 222 M+ (35), 190 (10), 165 (100), 150 (20). 91 (25). Analysis calcd. for C12H14O4 (222.24) C, 64.88; H, 6.35. Found : C, 64.62; H, 6.15.
